# Supplementary material for: Impact of filgotinib on pain control in the phase 3 FINCH studies
Source: PubMed Central journal article supplement — RMD Open. 2024 Mar 12;10(1):e003839. doi: 10.1136/rmdopen-2023-003839 (PMC10936501; doi:10.1136/rmdopen-2023-003839), 2024-03-12
Supplement: rmdopen-2023-003839supp001.pdf [file rmdopen-2023-003839supp001.pdf]

# The impact of filgotinib on pain control in the Phase 3 FINCH studies

A post hoc analysis of the **FINCH 1, 2 & 3** studies was performed to evaluate the effects of filgotinib on pain in patients with RA

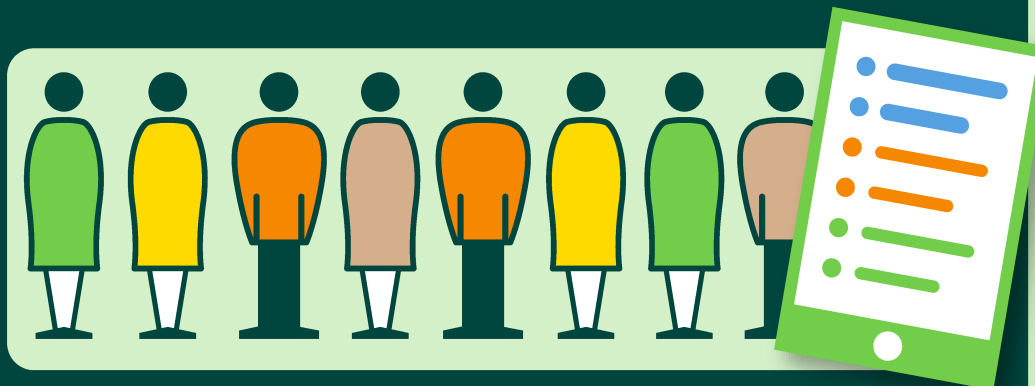

Pain was assessed on a 100 mm visual analogue scale (VAS)

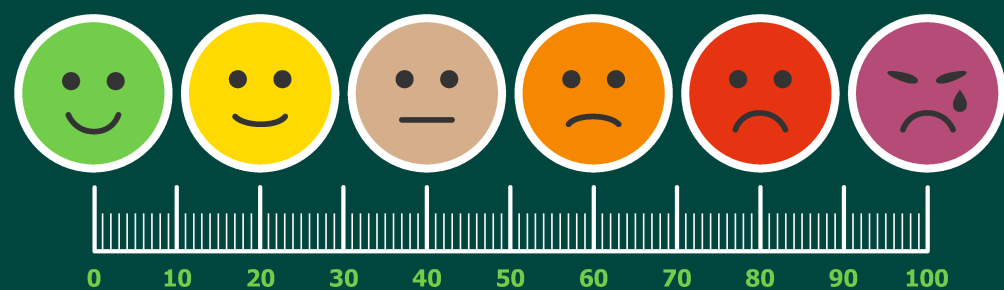

## Key findings

**Filgotinib** reduced pain from as early as **week 2** and responses were sustained throughout the studies up to:

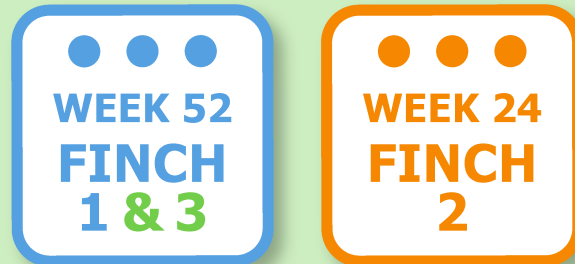

## In FINCH 1

a greater proportion of patients treated with **filgotinib 200 mg** vs **adalimumab** achieved VAS pain  $\leq 10$  or  $\leq 20$  mm

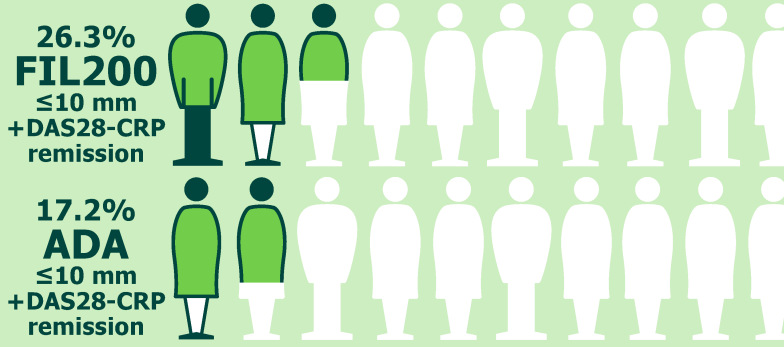

in addition to DAS28-CRP or CDAI remission at **WEEK 24**

## FINCH 1

### DAS28-CRP Remission (% of patients)

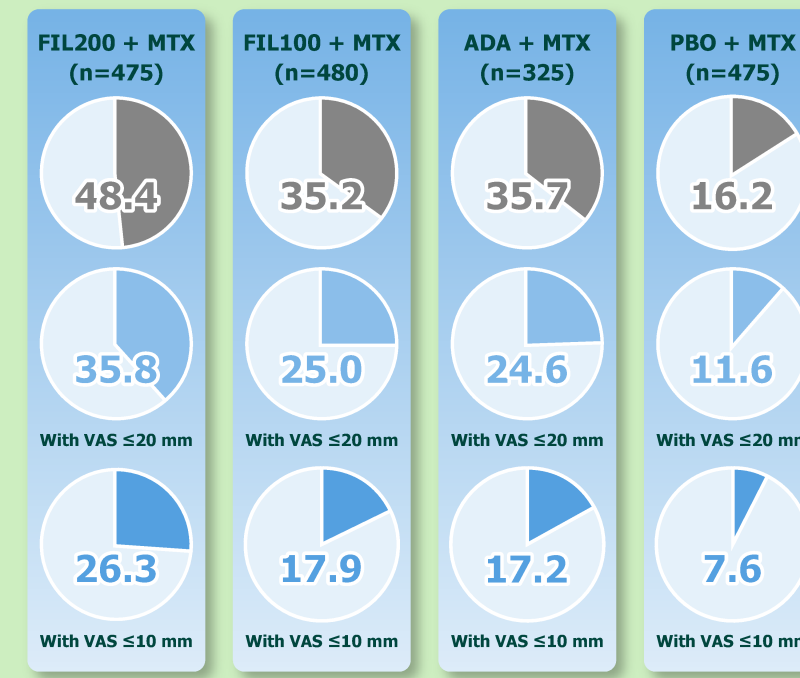

### CDAI Remission (% of patients)

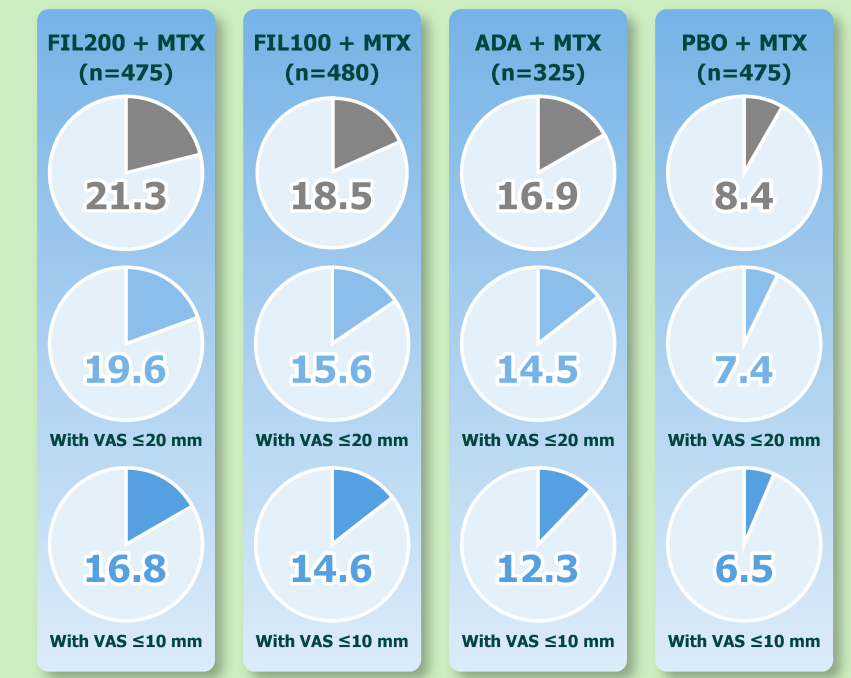

## In FINCH 1

the time during which VAS pain was  $\leq 10$  or  $\leq 20$  mm was longest with **filgotinib 200 mg** and comparable between **adalimumab** and **filgotinib 100 mg**

### Duration of VAS pain score $\leq 10$ mm

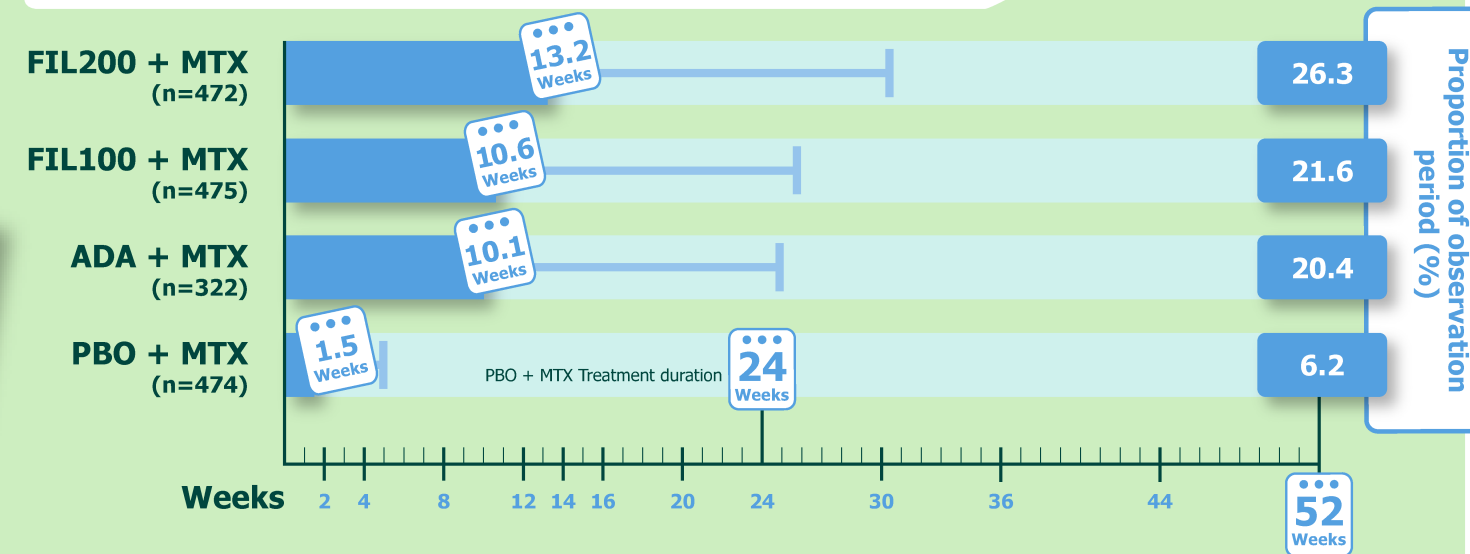

### Duration of VAS pain score $\leq 20$ mm

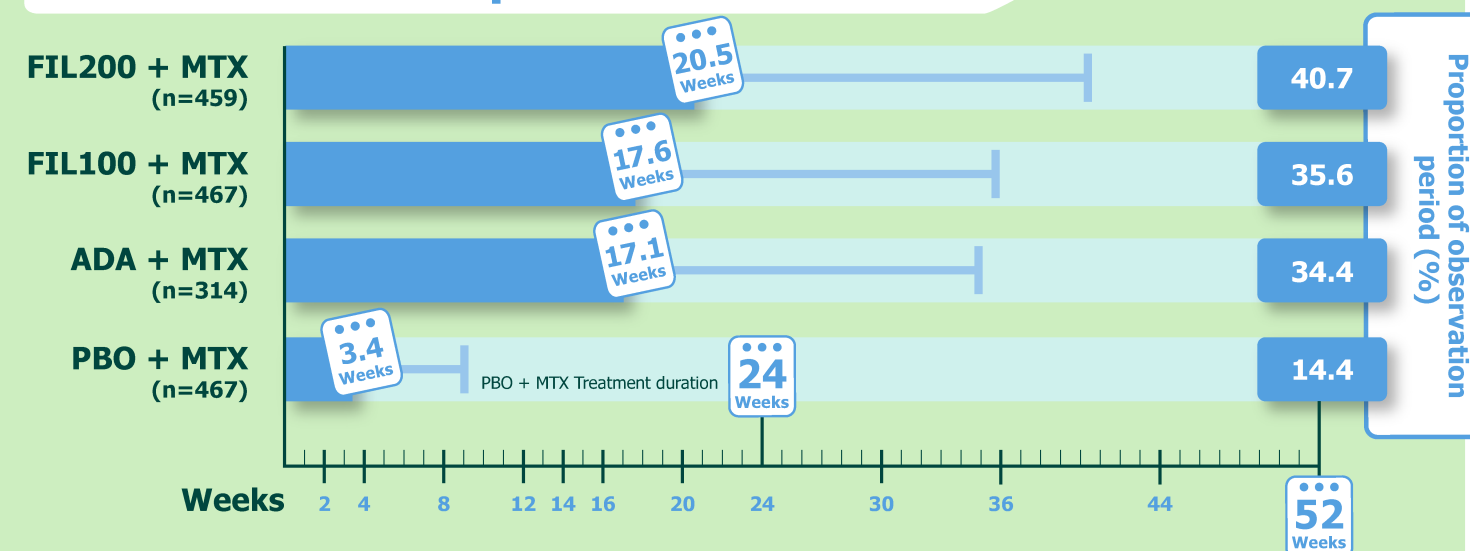

## Reductions in pain in FINCH 1

of **30%, 50%, 70% & 90%**

These were all reached earlier with either **filgotinib 200 mg** or **100 mg** than with placebo and were reached earlier with **filgotinib 200 mg** for 30%, 50%, and 70%, but not 90%, than with **adalimumab**

### HR comparison of FIL vs PBO (HR 95% CI)

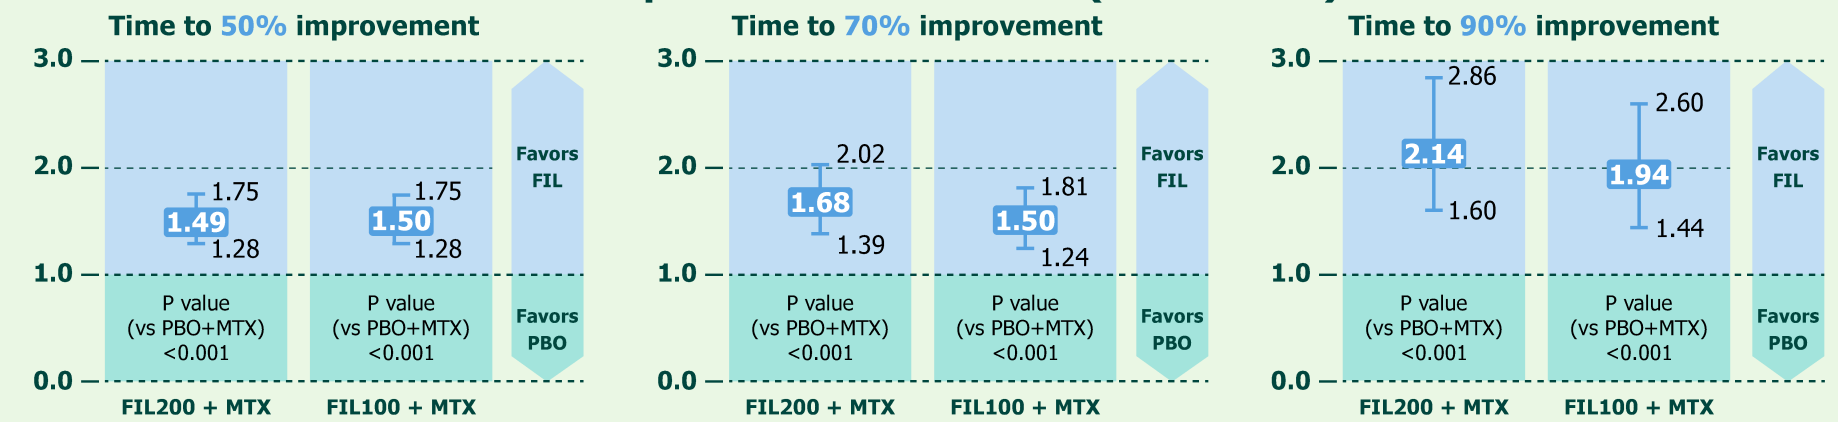

### HR comparison of FIL vs ADA (HR 95% CI)

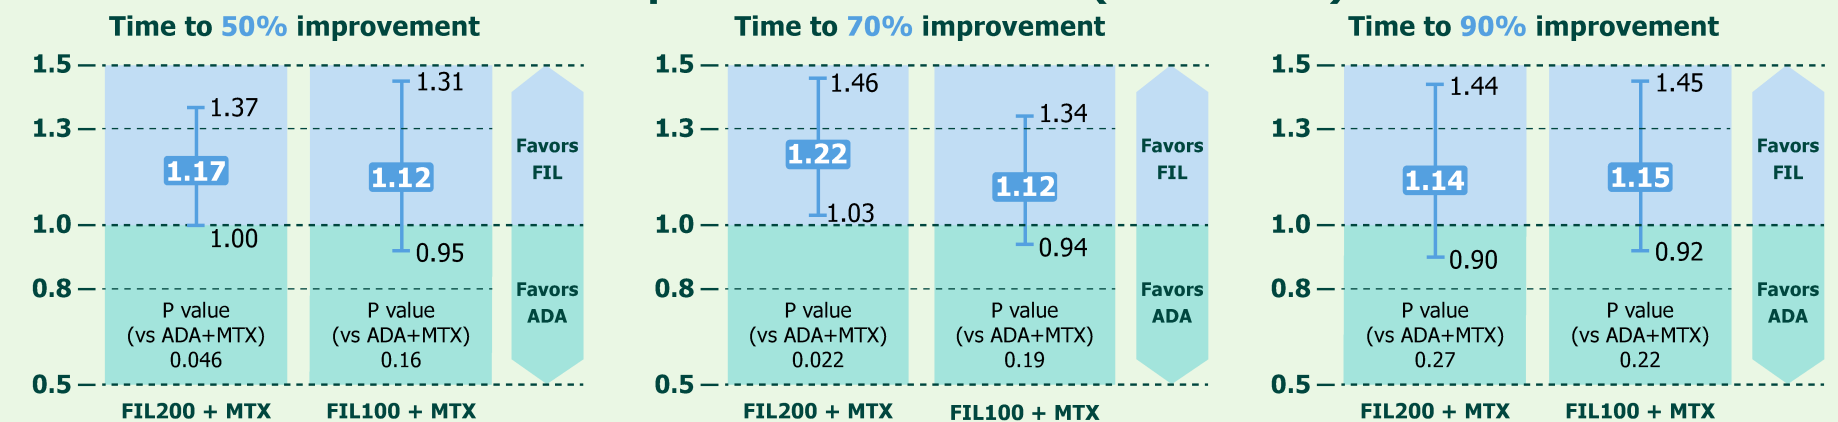

Similar findings were reported for filgotinib in

**FINCH 2 & 3**
