# Supplementary material for: Impact of filgotinib on pain control in the phase 3 FINCH studies
Source: PubMed Central journal article supplement — RMD Open. 2024 Mar 12;10(1):e003839. doi: 10.1136/rmdopen-2023-003839 (PMC10936501; doi:10.1136/rmdopen-2023-003839), 2024-03-12
Supplement: rmdopen-2023-003839supp002.pdf [file rmdopen-2023-003839supp002.pdf]

**Supplementary material for:****The impact of filgotinib on pain control in the Phase 3 FINCH studies**

Peter C. Taylor, Arthur Kavanaugh, Peter Nash, Janet Pope, Georg Pongratz, Bruno Fautrel, Rieke Alten, Ken Hasegawa, Shangbang Rao, Dick de Vries, Pieter-Jan Stiers, Chris Watson, Rene Westhovens

**Supplementary Table 1.** Baseline characteristics according to VAS pain score at Week 24 in FINCH 1

|                                  | <b>All treatment arms</b>            |                                                   |                                         |
|----------------------------------|--------------------------------------|---------------------------------------------------|-----------------------------------------|
| <b>Characteristic, mean (SD)</b> | <b>VAS pain score ≤10 mm (n=634)</b> | <b>VAS pain score &gt;10 mm to ≤20 mm (n=306)</b> | <b>VAS pain score &gt;20 mm (n=804)</b> |
| DAS28-CRP                        | 5.51 (0.93)                          | 5.72 (0.85)                                       | 5.89 (0.88)                             |
| HAQ-DI                           | 1.407 (0.644)                        | 1.579 (0.622)                                     | 1.733 (0.540)                           |
| Patient global VAS score, mm     | 60.6 (21.7)                          | 65.8 (18.9)                                       | 72.0 (15.3)                             |
| Physician global VAS score, mm   | 62.5 (16.9)                          | 65.3 (15.9)                                       | 68.5 (15.0)                             |
| VAS pain score, mm               | 58.6 (22.6)                          | 64.7 (19.2)                                       | 70.4 (15.5)                             |
| CDAI                             | 36.9 (11.6)                          | 38.6 (11.3)                                       | 41.2 (11.8)                             |
| SF36 PCS                         | 35.5 (7.9)*                          | 33.6 (7.2) <sup>†</sup>                           | 31.3 (6.5) <sup>‡</sup>                 |
|                                  | <b>FIL200 + MTX</b>                  |                                                   |                                         |
| <b>Characteristic, mean (SD)</b> | <b>VAS pain score ≤10 mm (n=215)</b> | <b>VAS pain score &gt;10 mm to ≤20 mm (n=76)</b>  | <b>VAS pain score &gt;20 mm (n=182)</b> |
| DAS28-CRP                        | 5.57 (0.90)                          | 5.77 (0.83)                                       | 5.95 (0.84)                             |
| HAQ-DI                           | 1.423 (0.639)                        | 1.656 (0.642)                                     | 1.747 (0.512)                           |
| Patient global VAS score, mm     | 61.9 (21.0)                          | 66.6 (18.3)                                       | 73.4 (15.1)                             |
| Physician global VAS score, mm   | 62.6 (16.9)                          | 67.4 (14.5)                                       | 68.7 (14.9)                             |
| VAS pain score, mm               | 59.4 (22.5)                          | 66.2 (19.0)                                       | 70.5 (16.1)                             |
| CDAI                             | 37.3 (11.5)                          | 40.1 (12.1)                                       | 41.9 (11.7)                             |
| SF36 PCS                         | 35.1 (7.7)                           | 33.1 (7.1)                                        | 31.6 (6.1) <sup>¶</sup>                 |
|                                  | <b>FIL100 + MTX</b>                  |                                                   |                                         |
| <b>Characteristic, mean (SD)</b> | <b>VAS pain score ≤10 mm (n=191)</b> | <b>VAS pain score &gt;10 mm to ≤20 mm (n=85)</b>  | <b>VAS pain score &gt;20 mm (n=202)</b> |
| DAS28-CRP                        | 5.49 (1.00)                          | 5.62 (0.87)                                       | 5.90 (0.88)                             |
| HAQ-DI                           | 1.383 (0.671)                        | 1.513 (0.624)                                     | 1.719 (0.534)                           |
| Patient global VAS score, mm     | 58.4 (22.2)                          | 65.2 (18.2)                                       | 71.5 (15.2)                             |
| Physician global VAS score, mm   | 62.0 (16.4)                          | 63.5 (17.3)                                       | 67.5 (15.7)                             |
| VAS pain score, mm               | 57.8 (22.8)                          | 64.3 (18.6)                                       | 70.6 (15.5)                             |
| CDAI                             | 36.5 (12.5)                          | 37.3 (11.7)                                       | 41.1 (11.7)                             |
| SF36 PCS                         | 36.1 (8.1)                           | 34.1 (7.5) <sup>§</sup>                           | 31.0 (6.7)                              |
|                                  | <b>ADA + MTX</b>                     |                                                   |                                         |
| <b>Characteristic, mean (SD)</b> | <b>VAS pain score ≤10 mm (n=110)</b> | <b>VAS pain score &gt;10 mm to ≤20 mm (n=59)</b>  | <b>VAS pain score &gt;20 mm (n=155)</b> |
| DAS28-CRP                        | 5.42 (0.88)                          | 5.81 (0.74)                                       | 5.86 (0.89)                             |
| HAQ-DI                           | 1.422 (0.602)                        | 1.528 (0.621)                                     | 1.735 (0.549)                           |
| Patient global VAS score, mm     | 59.6 (21.4)                          | 66.3 (19.5)                                       | 72.7 (15.0)                             |

|                                  |                                      |                                                  |                                         |
|----------------------------------|--------------------------------------|--------------------------------------------------|-----------------------------------------|
| Physician global VAS score, mm   | 61.9 (16.7)                          | 67.1 (13.3)                                      | 70.0 (14.5)                             |
| VAS pain score, mm               | 55.8 (22.4)                          | 64.6 (18.3)                                      | 70.9 (14.6)                             |
| CDAI                             | 36.6 (10.7)                          | 39.6 (10.3)                                      | 40.9 (12.2)                             |
| SF36 PCS                         | 35.9 (7.9) <sup>  </sup>             | 32.7 (7.3) <sup>**</sup>                         | 30.5 (7.0)                              |
| <b>PBO + MTX</b>                 |                                      |                                                  |                                         |
| <b>Characteristic, mean (SD)</b> | <b>VAS pain score ≤10 mm (n=118)</b> | <b>VAS pain score &gt;10 mm to ≤20 mm (n=86)</b> | <b>VAS pain score &gt;20 mm (n=265)</b> |
| DAS28-CRP                        | 5.52 (0.93)                          | 5.70 (0.91)                                      | 5.87 (0.89)                             |
| HAQ-DI                           | 1.401 (0.655)                        | 1.612 (0.605)                                    | 1.733 (0.559)                           |
| Patient global VAS score, mm     | 62.6 (22.1)                          | 65.4 (19.9)                                      | 70.9 (15.7)                             |
| Physician global VAS score, mm   | 63.5 (17.9)                          | 64.1 (17.2)                                      | 68.1 (14.7)                             |
| VAS pain score, mm               | 61.0 (22.3)                          | 63.8 (21.0)                                      | 69.9 (15.7)                             |
| CDAI                             | 37.5 (11.4)                          | 37.8 (11.0)                                      | 41.1 (11.8)                             |
| SF36 PCS                         | 35.0 (7.8)                           | 34.2 (6.9)                                       | 31.6 (6.5) <sup>††</sup>                |

\*n=633; †n=304; ‡n=801; ¶n=180; §n=84; ||n=109; \*\*n=58; ††n=264.

ADA, adalimumab; CDAI, Clinical Disease Activity Index; DAS28-CRP, Disease Activity Score-28 with C-reactive protein; FIL100/200, filgotinib 100/200 mg; HAQ-DI, Health Assessment Questionnaire–Disability Index; PBO, placebo; PCS, physical component summary score; SD, standard deviation; SF-36, 36-item short-form health survey; VAS, visual analogue scale.

**Supplementary Table 2.** Baseline characteristics according to VAS pain score at Week 24 in FINCH 2

|                                  | <b>All treatment arms</b>            |                                                  |                                         |
|----------------------------------|--------------------------------------|--------------------------------------------------|-----------------------------------------|
| <b>Characteristic, mean (SD)</b> | <b>VAS pain score ≤10 mm (n=133)</b> | <b>VAS pain score &gt;10 mm to ≤20 mm (n=71)</b> | <b>VAS pain score &gt;20 mm (n=242)</b> |
| DAS28-CRP                        | 5.74 (1.01)                          | 5.60 (1.06)                                      | 6.09 (0.86)                             |
| HAQ-DI                           | 1.471 (0.682)                        | 1.502 (0.688)                                    | 1.820 (0.590)                           |
| Patient global VAS score, mm     | 62.5 (23.5)                          | 61.7 (19.7)                                      | 74.6 (15.1)                             |
| Physician global VAS score, mm   | 65.3 (21.6)                          | 64.9 (17.6)                                      | 69.2 (15.0)                             |
| VAS pain score, mm               | 61.5 (24.9)                          | 57.5 (23.6)                                      | 73.1 (15.3)                             |
| CDAI                             | 39.2 (13.5)                          | 37.2 (12.7)                                      | 43.4 (12.8)                             |
| SF36 PCS                         | 34.1 (8.1)*                          | 33.0 (8.4)                                       | 28.9 (6.9)                              |
|                                  | <b>FIL200</b>                        |                                                  |                                         |
| <b>Characteristic, mean (SD)</b> | <b>VAS pain score ≤10 mm (n=55)</b>  | <b>VAS pain score &gt;10 mm to ≤20 mm (n=28)</b> | <b>VAS pain score &gt;20 mm (n=64)</b>  |
| DAS28-CRP                        | 5.89 (1.09)                          | 5.44 (1.13)                                      | 6.15 (0.85)                             |
| HAQ-DI                           | 1.568 (0.597)                        | 1.487 (0.711)                                    | 1.916 (0.625)                           |
| Patient global VAS score, mm     | 62.6 (24.2)                          | 60.9 (18.3)                                      | 75.7 (15.2)                             |
| Physician global VAS score, mm   | 72.3 (20.0)                          | 66.6 (17.2)                                      | 67.2 (15.2)                             |
| VAS pain score, mm               | 61.6 (24.9)                          | 57.0 (21.0)                                      | 74.6 (15.2)                             |
| CDAI                             | 41.3 (14.6)                          | 35.0 (12.5)                                      | 44.9 (13.7)                             |
| SF36 PCS                         | 33.4 (7.5)†                          | 31.5 (8.1)                                       | 27.5 (6.8)                              |
|                                  | <b>FIL100</b>                        |                                                  |                                         |
| <b>Characteristic, mean (SD)</b> | <b>VAS pain score ≤10 mm (n=53)</b>  | <b>VAS pain score &gt;10 mm to ≤20 mm (n=21)</b> | <b>VAS pain score &gt;20 mm (n=77)</b>  |
| DAS28-CRP                        | 5.61 (0.99)                          | 5.64 (1.08)                                      | 6.13 (0.91)                             |
| HAQ-DI                           | 1.450 (0.685)                        | 1.357 (0.597)                                    | 1.844 (0.637)                           |
| Patient global VAS score, mm     | 61.7 (24.4)                          | 60.9 (19.0)                                      | 75.5 (14.6)                             |
| Physician global VAS score, mm   | 59.7 (20.8)                          | 69.4 (14.2)                                      | 72.1 (16.5)                             |
| VAS pain score, mm               | 61.7 (24.7)                          | 55.0 (24.8)                                      | 74.4 (15.3)                             |
| CDAI                             | 36.3 (12.6)                          | 39.7 (13.8)                                      | 43.4 (13.0)                             |
| SF36 PCS                         | 34.6 (7.7)                           | 34.9 (8.5)                                       | 29.0 (6.6)                              |
|                                  | <b>PBO</b>                           |                                                  |                                         |
| <b>Characteristic, mean (SD)</b> | <b>VAS pain score ≤10 mm (n=25)</b>  | <b>VAS pain score &gt;10 mm to ≤20 mm (n=22)</b> | <b>VAS pain score &gt;20 mm (n=101)</b> |
| DAS28-CRP                        | 5.67 (0.84)                          | 5.78 (0.95)                                      | 6.02 (0.83)                             |
| HAQ-DI                           | 1.300 (0.828)                        | 1.659 (0.737)                                    | 1.741 (0.520)                           |
| Patient global VAS score, mm     | 64.2 (20.9)                          | 63.7 (22.5)                                      | 73.3 (15.4)                             |

|                                |             |             |             |
|--------------------------------|-------------|-------------|-------------|
| Physician global VAS score, mm | 61.8 (22.8) | 58.5 (19.8) | 68.3 (13.4) |
| VAS pain score, mm             | 60.8 (26.5) | 60.4 (26.1) | 71.2 (15.3) |
| CDAI                           | 40.7 (11.8) | 37.7 (11.8) | 42.3 (12.0) |
| SF36 PCS                       | 34.5 (10.1) | 33.1 (8.8)  | 29.8 (7.2)  |

\*n=132; †n=54.

CDAI, Clinical Disease Activity Index; DAS28-CRP, Disease Activity Score-28 with C-reactive protein; FIL100/200, filgotinib 100/200 mg; HAQ-DI, Health Assessment Questionnaire–Disability Index; PBO, placebo; PCS, physical component summary score; SD, standard deviation; SF-36, 36-item short-form health survey; VAS, visual analogue scale.

**Supplementary Table 3.** Baseline characteristics according to VAS pain score at Week 24 in FINCH 3

|                                  | <b>All treatment arms</b>            |                                                   |                                         |
|----------------------------------|--------------------------------------|---------------------------------------------------|-----------------------------------------|
| <b>Characteristic, mean (SD)</b> | <b>VAS pain score ≤10 mm (n=538)</b> | <b>VAS pain score &gt;10 mm to ≤20 mm (n=185)</b> | <b>VAS pain score &gt;20 mm (n=511)</b> |
| DAS28-CRP                        | 5.56 (1.01)                          | 5.66 (1.05)                                       | 5.92 (0.92)                             |
| HAQ-DI                           | 1.404 (0.685)                        | 1.607 (0.603)*                                    | 1.700 (0.550) <sup>†</sup>              |
| Patient global VAS score, mm     | 60.7 (23.0)                          | 65.6 (20.7)                                       | 71.4 (16.7)                             |
| Physician global VAS score, mm   | 64.0 (17.1)                          | 66.0 (17.6)                                       | 69.5 (14.8)                             |
| VAS pain score, mm               | 59.9 (23.8)                          | 65.2 (20.3)*                                      | 70.9 (16.9) <sup>†</sup>                |
| CDAI                             | 37.7 (12.7)                          | 39.4 (13.2)                                       | 42.0 (12.0)                             |
| SF36 PCS                         | 35.7 (8.0) <sup>‡</sup>              | 33.6 (7.5)                                        | 31.4 (6.4) <sup>¶</sup>                 |
|                                  | <b>FIL200 + MTX</b>                  |                                                   |                                         |
| <b>Characteristic, mean (SD)</b> | <b>VAS pain score ≤10 mm (n=221)</b> | <b>VAS pain score &gt;10 mm to ≤20 mm (n=62)</b>  | <b>VAS pain score &gt;20 mm (n=129)</b> |
| DAS28-CRP                        | 5.69 (1.04)                          | 5.64 (1.04)                                       | 5.81 (0.89)                             |
| HAQ-DI                           | 1.415 (0.69))                        | 1.611 (0.512) <sup>§</sup>                        | 1.644 (0.498) <sup>  </sup>             |
| Patient global VAS score, mm     | 62.1 (22.7)                          | 66.1 (21.6)                                       | 70.1 (16.1)                             |
| Physician global VAS score, mm   | 64.4 (17.5)                          | 66.2 (17.5)                                       | 69.7 (15.4)                             |
| VAS pain score, mm               | 60.1 (23.9)                          | 62.9 (23.0) <sup>§</sup>                          | 69.9 (15.7) <sup>  </sup>               |
| CDAI                             | 38.6 (13.3)                          | 39.3 (12.6)                                       | 41.1 (11.8)                             |
| SF36 PCS                         | 35.1 (8.2)**                         | 33.4 (6.7)                                        | 31.9 (6.0) <sup>  </sup>                |
|                                  | <b>FIL100 + MTX</b>                  |                                                   |                                         |
| <b>Characteristic, mean (SD)</b> | <b>VAS pain score ≤10 mm (n=91)</b>  | <b>VAS pain score &gt;10 mm to ≤20 mm (n=23)</b>  | <b>VAS pain score &gt;20 mm (n=89)</b>  |
| DAS28-CRP                        | 5.36 (0.99)                          | 5.67 (1.30)                                       | 5.97 (0.93)                             |
| HAQ-DI                           | 1.370 (0.740)                        | 1.636 (0.620)                                     | 1.709 (0.518)                           |
| Patient global VAS score, mm     | 57.2 (24.2)                          | 69.3 (18.1)                                       | 73.2 (16.1)                             |
| Physician global VAS score, mm   | 63.7 (18.2)                          | 69.1 (18.2)                                       | 71.3 (12.9)                             |
| VAS pain score, mm               | 58.4 (25.1)                          | 67.2 (18.7)                                       | 73.9 (16.4)                             |
| CDAI                             | 35.7 (12.3)                          | 41.4 (16.8)                                       | 42.1 (11.2)                             |
| SF36 PCS                         | 37.1 (8.3)                           | 31.6 (7.0)                                        | 31.1 (6.6)                              |
|                                  | <b>FIL200</b>                        |                                                   |                                         |
| <b>Characteristic, mean (SD)</b> | <b>VAS pain score ≤10 mm (n=95)</b>  | <b>VAS pain score &gt;10 mm to ≤20 mm (n=26)</b>  | <b>VAS pain score &gt;20 mm (n=86)</b>  |
| DAS28-CRP                        | 5.63 (0.93)                          | 5.69 (1.09)                                       | 5.94 (0.88)                             |
| HAQ-DI                           | 1.349 (0.633)                        | 1.760 (0.692)                                     | 1.715 (0.615)                           |
| Patient global VAS score, mm     | 61.2 (19.9)                          | 67.7 (20.7)                                       | 74.5 (15.5)                             |

|                                  |                                      |                                                  |                                         |
|----------------------------------|--------------------------------------|--------------------------------------------------|-----------------------------------------|
| Physician global VAS score, mm   | 63.7 (13.9)                          | 65.9 (18.3)                                      | 69.0 (13.4)                             |
| VAS pain score, mm               | 61.0 (19.2)                          | 67.3 (19.4)                                      | 73.3 (15.1)                             |
| CDAI                             | 38.5 (12.1)                          | 38.0 (13.0)                                      | 42.1 (12.9)                             |
| SF36 PCS                         | 36.5 (7.2)                           | 32.8 (8.7)                                       | 30.8 (6.9) <sup>††</sup>                |
| <b>MTX</b>                       |                                      |                                                  |                                         |
| <b>Characteristic, mean (SD)</b> | <b>VAS pain score ≤10 mm (n=131)</b> | <b>VAS pain score &gt;10 mm to ≤20 mm (n=74)</b> | <b>VAS pain score &gt;20 mm (n=207)</b> |
| DAS28-CRP                        | 5.44 (1.01)                          | 5.66 (0.98)                                      | 5.97 (0.95)                             |
| HAQ-DI                           | 1.449 (0.677)                        | 1.541 (0.635)                                    | 1.725 (0.566)                           |
| Patient global VAS score, mm     | 60.6 (24.7)                          | 63.3 (20.7)                                      | 70.0 (17.6)                             |
| Physician global VAS score, mm   | 63.9 (17.8)                          | 64.8 (17.5)                                      | 68.7 (15.8)                             |
| VAS pain score, mm               | 59.9 (26.0)                          | 65.8 (18.8)                                      | 69.4 (18.4)                             |
| CDAI                             | 37.1 (12.2)                          | 39.4 (12.7)                                      | 42.6 (12.2)                             |
| SF36 PCS                         | 35.2 (7.9)                           | 34.6 (7.9)                                       | 31.5 (6.3)                              |

\*n=184; †n=510; ‡n=537; ¶n=508; §n=61; ||n=128; \*\*n=220; ††n=84.

CDAI, Clinical Disease Activity Index; DAS28-CRP, Disease Activity Score-28 with C-reactive protein; FIL100/200, filgotinib 100/200 mg; HAQ-DI, Health Assessment Questionnaire–Disability Index; MTX, methotrexate; PCS, physical component summary score; SD, standard deviation; SF-36, 36-item short-form health survey; VAS, visual analogue scale.
